# Supplementary material
Source: PubMed Central journal article supplement (PMC5923140)
Supplement: AAC.02318-17_zac005187097s1.pdf [file AAC.02318-17_zac005187097s1.pdf]

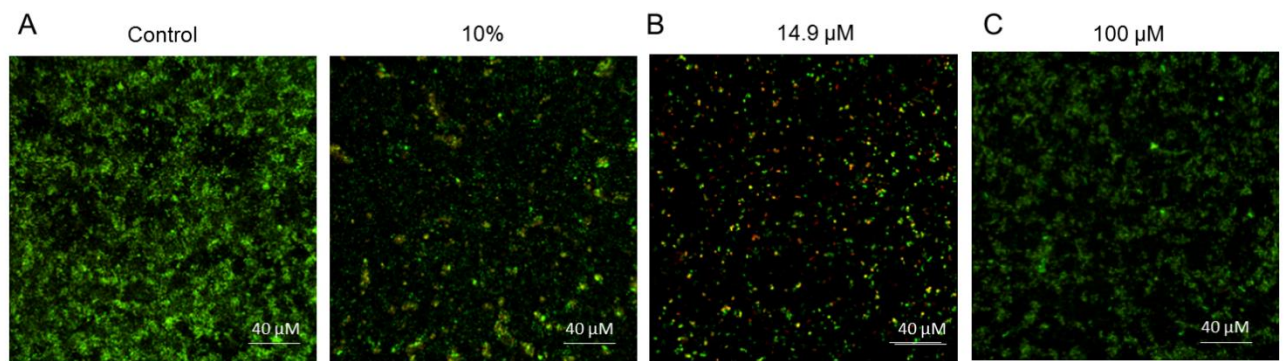

**FIG S1** Confocal laser scanning microscopy of *Pseudomonas aeruginosa* PAO1 24 h biofilms treated with quorum sensing inhibitors. (A) OligoG CF-5/20, 0 and 10%. (B) 2(5H)-furanone, 1.25 μg/mL (14.9 μM). (C) N-decanoyl cyclopentylamide (C10-CPA), 100 μM, (n=3).

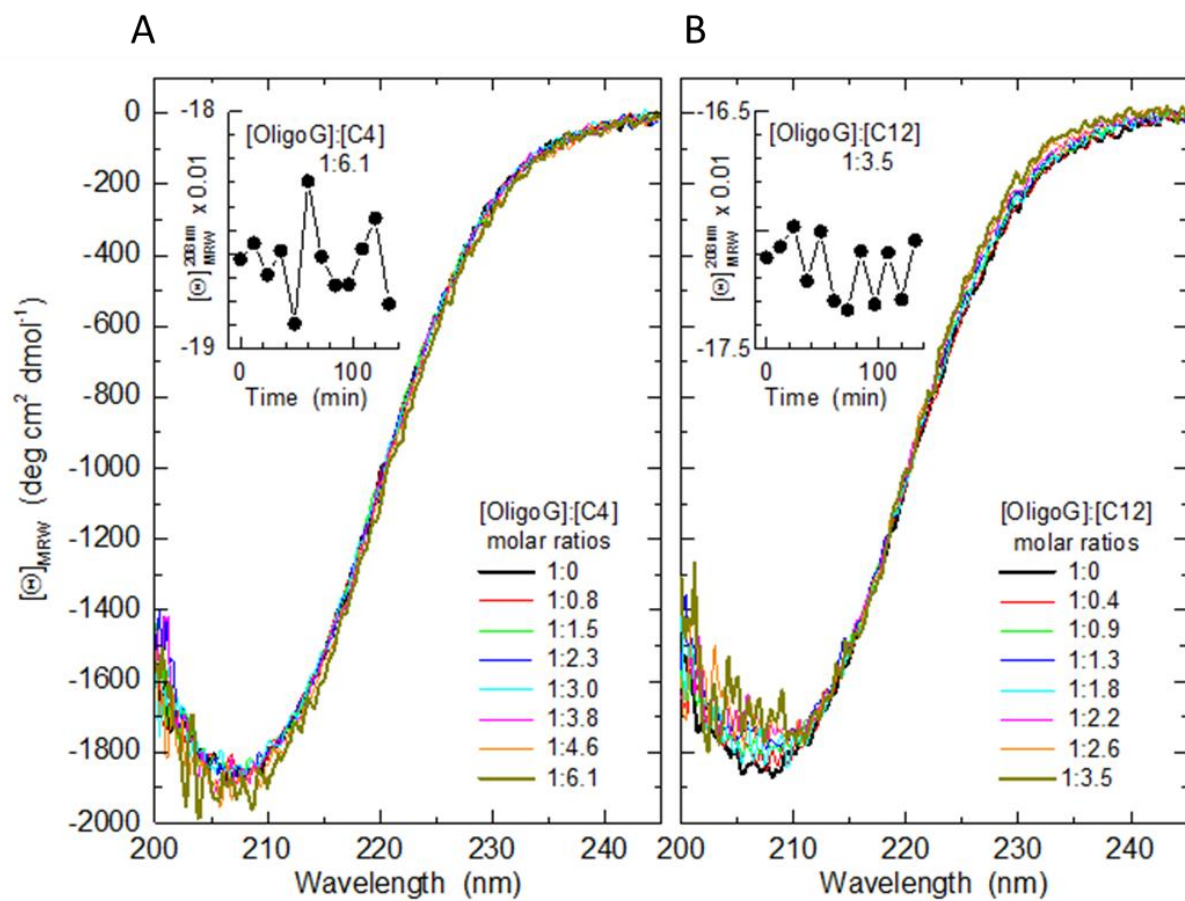

**FIG S2** Circular dichroism spectra showing the effect of OligoG (at a range of molar ratios) on homoserine lactones. (A) C4-AHL and (B) 3-oxo-C12 AHL. Insets show a time course recorded at 208nm after addition of AHLs at their maximum concentration.
